# Supplementary material for: Comparison of Extracellular Vesicles from Induced Pluripotent Stem Cell-Derived Brain Cells
Source: MDPI journal article supplement (doi:10.3390/ijms25073575), 2024-03-22
Supplement: s1 [file s1]

## Supplementary Figure S1

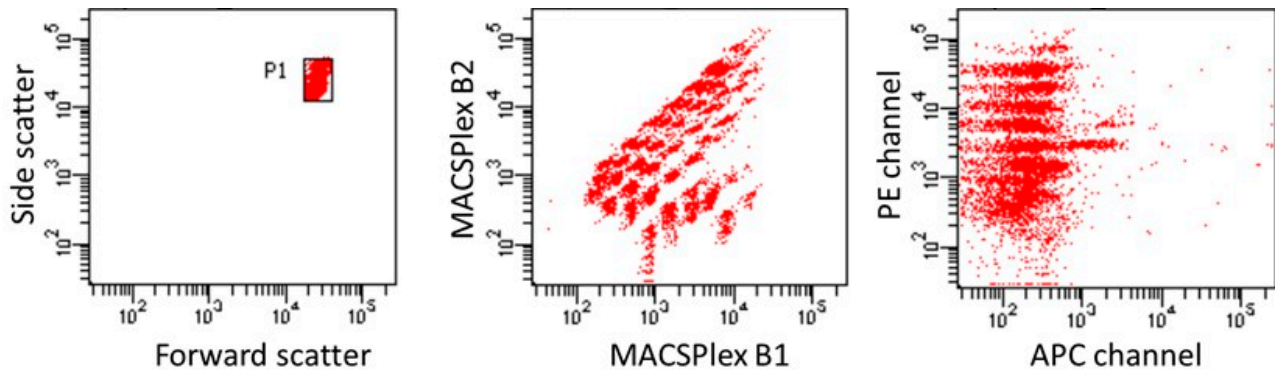

**Supplementary Figure S1: Raw data of flow cytometric analysis.** Left: gating results using forward and sideward scatter according to bead size are cropped in P1. Middle: dot plot showing the discrimination of differently labeled bead populations of P1. Right: dot plot showing captured bead signals in allophycocyanin (APC) and phycoerythrin (PE) channels for visualization of signal intensities of the single bead populations.

Supplementary Table S1

| Supplementary Table S1: Cell type-specific epitope enrichment in HC                                                                                                                                                                                                  |       |       |                           |             |                 |              |              |          |
|----------------------------------------------------------------------------------------------------------------------------------------------------------------------------------------------------------------------------------------------------------------------|-------|-------|---------------------------|-------------|-----------------|--------------|--------------|----------|
| Marker /<br>encoded<br>by                                                                                                                                                                                                                                            | ANOVA |       |                           | Tukey HSD   |                 |              |              |          |
|                                                                                                                                                                                                                                                                      | df    | F     | p-value<br>(adj. p-value) | Cell Type I | Mean<br>(Stdev) | Cell Type II | Mean (Stdev) | p-value  |
| CD29<br>/ ITGB1                                                                                                                                                                                                                                                      | 5     | 8.70  | 3.06E-04<br>(8.87E-03)    | Astrocytes  | 3.571<br>(1.71) | BCEC         | 0.303 (0.20) | 1.88E-04 |
|                                                                                                                                                                                                                                                                      |       |       |                           |             |                 | Microglia    | 1.227 (0.04) | 1.82E-02 |
|                                                                                                                                                                                                                                                                      |       |       |                           |             |                 | Neurons      | 0.701 (0.17) | 1.36E-03 |
|                                                                                                                                                                                                                                                                      |       |       |                           |             |                 | NPCs         | 1.258 (0.64) | 2.27E-03 |
|                                                                                                                                                                                                                                                                      |       |       |                           |             |                 | NSCs         | 0.133 (0.02) | 5.34E-04 |
| CD44<br>/ CD44                                                                                                                                                                                                                                                       | 5     | 33.12 | 3.46E-08<br>(1.00E-06)    | Astrocytes  | 1.703<br>(0.55) | BCEC         | 0.094 (0.04) | 1.05E-07 |
|                                                                                                                                                                                                                                                                      |       |       |                           |             |                 | Microglia    | 0.883 (0.29) | 2.82E-03 |
|                                                                                                                                                                                                                                                                      |       |       |                           |             |                 | Neurons      | 0.259 (0.22) | 1.07E-06 |
|                                                                                                                                                                                                                                                                      |       |       |                           |             |                 | NPCs         | 0.134 (0.07) | 2.88E-08 |
|                                                                                                                                                                                                                                                                      |       |       |                           | Microglia   | 0.883<br>(0.29) | NSCs         | 0.006 (0.00) | 3.91E-07 |
|                                                                                                                                                                                                                                                                      |       |       |                           |             |                 | BCEC         | 0.094 (0.04) | 9.79E-04 |
|                                                                                                                                                                                                                                                                      |       |       |                           |             |                 | Neurons      | 0.259 (0.22) | 1.35E-02 |
|                                                                                                                                                                                                                                                                      |       |       |                           |             |                 | NPCs         | 0.134 (0.07) | 5.18E-04 |
| CD49e<br>/ ITGA5                                                                                                                                                                                                                                                     | 5     | 12.99 | 2.63E-05<br>(7.62E-04)    | Astrocytes  | 1.840<br>(0.60) | NSCs         | 0.006 (0.00) | 1.44E-03 |
|                                                                                                                                                                                                                                                                      |       |       |                           |             |                 | BCEC         | 0.129 (0.04) | 2.02E-05 |
|                                                                                                                                                                                                                                                                      |       |       |                           |             |                 | Microglia    | 0.595 (0.34) | 3.49E-03 |
|                                                                                                                                                                                                                                                                      |       |       |                           |             |                 | Neurons      | 0.176 (0.07) | 5.56E-05 |
|                                                                                                                                                                                                                                                                      |       |       |                           |             |                 | NPCs         | 0.524 (0.30) | 1.30E-04 |
| CD146<br>/ MCAM                                                                                                                                                                                                                                                      | 5     | 4.01  | 1.82E-02<br>(5.28E-01)    | Microglia   | 0.712<br>(0.74) | NSCs         | 0.020 (0.01) | 5.69E-05 |
|                                                                                                                                                                                                                                                                      |       |       |                           |             |                 | BCEC         | 0.007 (0.00) | 3.66E-02 |
|                                                                                                                                                                                                                                                                      |       |       |                           |             |                 | Neurons      | 0.027 (0.03) | 4.39E-02 |
|                                                                                                                                                                                                                                                                      |       |       |                           |             |                 | NPCs         | 0.046 (0.05) | 9.18E-03 |
| MCSP<br>/ CSPG4                                                                                                                                                                                                                                                      | 5     | 4.45  | 9.84E-03<br>(2.85E-01)    |             |                 |              |              |          |
| SSEA4                                                                                                                                                                                                                                                                | 5     | 50.99 | 1.22E-09<br>(3.55E-08)    | NSCs        | 1.323<br>(0.14) | Astrocytes   | 0.219 (0.09) | 2.46E-08 |
|                                                                                                                                                                                                                                                                      |       |       |                           |             |                 | BCEC         | 0.177 (0.05) | 1.52E-09 |
|                                                                                                                                                                                                                                                                      |       |       |                           |             |                 | Microglia    | 0.347 (0.02) | 1.53E-07 |
|                                                                                                                                                                                                                                                                      |       |       |                           |             |                 | Neurons      | 0.196 (0.15) | 4.43E-09 |
|                                                                                                                                                                                                                                                                      |       |       |                           |             |                 | NPCs         | 0.185 (0.09) | 2.91E-10 |
| df: degrees of freedom; F: ANOVA test value; adj. p-value: p-values were adjusted for 31 comparisons using Bonferroni correction; HC: healthy control; Stdev: standard deviation; Tukey's HSD: Tukey's honestly significant difference test alias Tukey's range test |       |       |                           |             |                 |              |              |          |

## Supplementary Table S2

**Supplementary Table S2: Disease-specific epitope enrichment: Comparison of HC with the combined patient group (SCZ + LOAD)**

| Marker<br>/ encoded by  | U       | Z      | p-value | Adj. p-value |
|-------------------------|---------|--------|---------|--------------|
| <b>CD14</b><br>/ CD14   | 121.000 | -2.259 | 0.024   | 0.69         |
| <b>CD133</b><br>/ PROM1 | 174.000 | -2.171 | 0.030   | 0.87         |
| <b>CD146</b><br>/ MCAM  | 115.000 | -2.107 | 0.035   | 1.00         |
| <b>SSEA4</b>            | 177.000 | -2.107 | 0.035   | 1.00         |

U: Mann-Whitney U test value; Adj. p-value: p-values adjusted for 31 comparisons using Bonferroni correction; HC: healthy control. SCZ: schizophrenia. LOAD: late-onset Alzheimer's disease.

Supplementary Table S3

Supplementary Table S3: Disease-specific epitope enrichment by comparison of HC, SCZ, and LOAD.

| Marker<br>/ encoded<br>by | ANOVA |      |                              | Tukey HSD |                 |          |              |                       |
|---------------------------|-------|------|------------------------------|-----------|-----------------|----------|--------------|-----------------------|
|                           | df    | F    | p-value<br>(adj.<br>p-value) | Group I   | Mean<br>(Stdev) | Group II | Mean (Stdev) | p-value               |
| CD1c<br>/ CD1C            | 2     | 8.93 | 9.04E-04<br>(2.62E-02)       | LOAD      | 0.155<br>(0.18) | HC       | 0.017 (0.02) | 9.92E-04              |
|                           |       |      |                              |           |                 | SCZ      | 0.015 (0.01) | 1.90E-03              |
| CD2<br>/ CD2              | 2     | 8.30 | 9.95E-04<br>(2.89E-02)       | LOAD      | 0.610<br>(0.77) | HC       | 0.113 (0.14) | 2.06E-03              |
|                           |       |      |                              |           |                 | SCZ      | 0.049 (0.06) | 1.03E-03              |
| CD11c<br>/ ITGAX          | 2     | 4.60 | 1.67E-02<br>(4.83E-01)       | LOAD      | 0.112<br>(0.16) | HC       | 0.033 (0.03) | 3.42E-02              |
|                           |       |      |                              |           |                 | SCZ      | 0.020 (0.01) | 1.61E-02              |
| CD41b<br>/ ITGA2B         | 2     | 3.92 | 2.72E-02<br>(7.89E-01)       | LOAD      | 0.565<br>(0.65) | HC       | 1.158 (1.83) | 7.37E-01 <sup>1</sup> |
|                           |       |      |                              |           |                 | SCZ      | 2.647 (2.45) | 4.64E-02              |
| CD56<br>/ NCAM1           | 2     | 4.72 | 1.40E-02<br>(4.07E-01)       | LOAD      | 0.286<br>(0.27) | HC       | 1.092 (1.65) | 3.63E-01 <sup>1</sup> |
|                           |       |      |                              |           |                 | SCZ      | 2.178 (1.64) | 1.32E-02              |
| CD62p<br>/ SELP           | 2     | 5.82 | 6.36E-03<br>(1.84E-01)       | LOAD      | 0.033<br>(0.04) | HC       | 0.008 (0.01) | 7.11E-03              |
|                           |       |      |                              |           |                 | SCZ      | 0.008 (0.01) | 1.53E-02              |

df: degrees of freedom; F: ANOVA test value; adj. p-value: p-values were adjusted for 31 comparisons using Bonferroni correction; HC: healthy control; SCZ: schizophrenia; LOAD: late-onset Alzheimer's disease; Stdev: standard deviation; <sup>1</sup>: no significant change.
